# Supplementary material
Source: PubMed Central journal article supplement (PMC6832692)
Supplement: NIHMS1055424-supplement-Appendix.pdf [file NIHMS1055424-supplement-Appendix.pdf]

**Appendix:**

**Figure 1S.** Locations of four Rakai Community Cohort Study (RCCS) fishing communities as designated by blue diamonds (RCCS agrarian communities are green triangles and trading communities are yellow circles).<sup>4</sup>

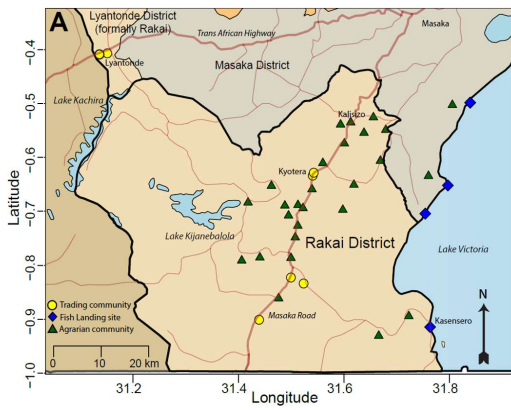

**Figure 2S.** Rakai Community Cohort Study (RCCS) fishing community survey participation over calendar time by participant sex.

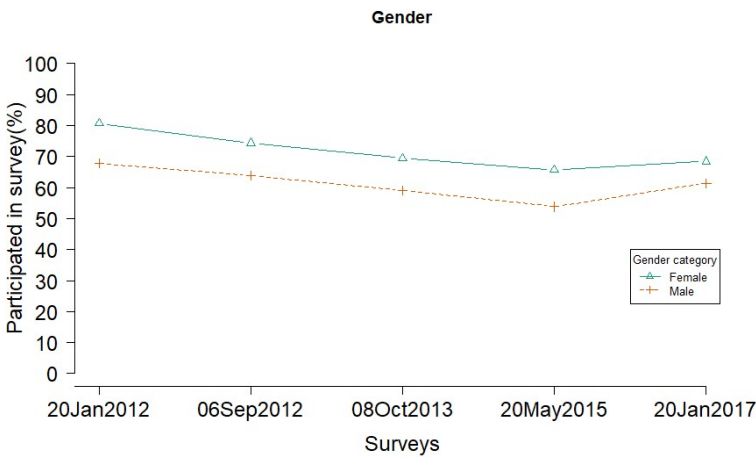

**Figure 3S.** Rakai Community Cohort Study (RCCS) fishing community survey participation over calendar time by participant age.

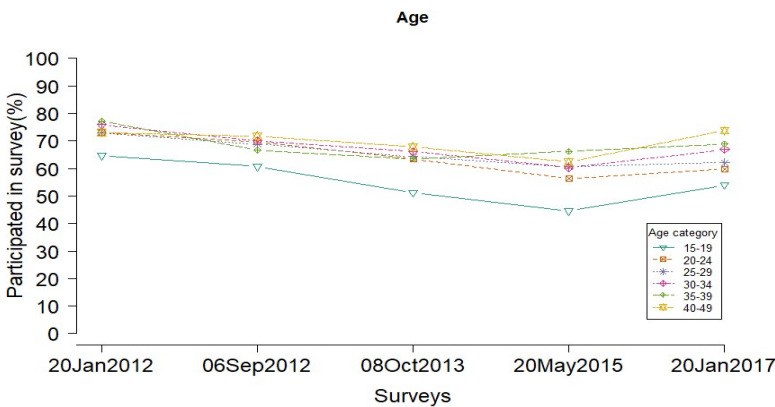

**Table 1S.** Participation and non-participation in the Rakai Community Cohort Study (RCCS) fishing community study (2011-2017) by survey round.

| Survey         | Participated<br>(n) | Away for work or<br>school*<br>(n) | Refused<br>(n) | Other**<br>(n) |
|----------------|---------------------|------------------------------------|----------------|----------------|
| <b>Overall</b> |                     |                                    |                |                |
| Jan.2012 (1)   | 72.6% (3870)        | 26.6% (1417)                       | 0.7% (37)      | 0.1% (6)       |
| Sep.2012 (2)   | 67.1% (3965)        | 31.6% (1866)                       | 1.2% (68)      | 0.2% (11)      |
| Oct.2013 (3)   | 63.2% (3926)        | 36.5% (2267)                       | 0.2% (13)      | 0.1% (8)       |
| May.2015 (4)   | 58.7% (4222)        | 41.0% (2948)                       | 0.0% (2)       | 0.3% (19)      |
| Jan.2017 (5)   | 63.5% (4738)        | 35.6% (2656)                       | 0.6% (45)      | 0.3% (23)      |
| <b>Female</b>  |                     |                                    |                |                |
| Jan.2012 (1)   | 79.6% (1859)        | 19.3% (450)                        | 1.0% (24)      | 0.1% (2)       |
| Sep.2012 (2)   | 72.7% (1839)        | 25.6% (647)                        | 1.5% (38)      | 0.3% (7)       |
| Oct.2013 (3)   | 68.9% (1863)        | 30.6% (827)                        | 0.3% (8)       | 0.1% (4)       |
| May.2015 (4)   | 65.4% (2068)        | 34.3% (1085)                       | -              | 0.3% (9)       |
| Jan.2017 (5)   | 67.5% (2213)        | 31.6% (1038)                       | 0.5% (17)      | 0.4% (12)      |
| <b>Male</b>    |                     |                                    |                |                |
| Jan.2012 (1)   | 67.1% (2011)        | 32.3% (967)                        | 0.4% (13)      | 0.1% (4)       |
| Sep.2012 (2)   | 62.9% (2126)        | 36.1% (1219)                       | 0.9% (30)      | 0.1% (4)       |
| Oct.2013 (3)   | 58.7% (2063)        | 41.0% (1440)                       | 0.1% (5)       | 0.1% (4)       |
| May.2015 (4)   | 53.5% (2154)        | 46.2% (1863)                       | 0.0% (2)       | 0.2% (10)      |
| Jan.2017 (5)   | 60.4% (2525)        | 38.6% (1618)                       | 0.7% (28)      | 0.3% (11)      |

\*These individuals were not present in the community at time of survey. Two attempts were made to locate these participants. \*\*Includes individuals who lused to provide a blood sample for HIV serology but who responded to the questionnaire.

**Table 2S.** Reasons for loss to follow-up in the Rakai Community Cohort Study (RCCS) fishing communities among HIV-negative persons between the previous and listed survey visit.

| Survey period  | Away     | Survey refusal | Blood Draw refusal | Already seen | Out-migrated | Dead   | Ineligible | Others |
|----------------|----------|----------------|--------------------|--------------|--------------|--------|------------|--------|
| <b>Overall</b> |          |                |                    |              |              |        |            |        |
| Sep.2012 (2)   | 332(49%) | 8(1%)          | 9(1%)              | 0(0%)        | 314(46%)     | 5(1%)  | 1(0%)      | 8(1%)  |
| Oct.2013 (3)   | 481(46%) | 5(0%)          | 2(0%)              | 4(0%)        | 535(51%)     | 2(0%)  | 10(1%)     | 10(1%) |
| May.2015 (4)   | 561(50%) | 0(0%)          | 10(1%)             | 5(0%)        | 516(46%)     | 9(1%)  | 14(1%)     | 9(1%)  |
| Jan.2017 (5)   | 531(40%) | 4(0%)          | 12(1%)             | 7(1%)        | 719(54%)     | 20(1%) | 28(2%)     | 19(1%) |
| <b>Female</b>  |          |                |                    |              |              |        |            |        |
| Sep.2012 (2)   | 131(47%) | 2(1%)          | 4(1%)              | 0(0%)        | 138(50%)     | 0(0%)  | 0(0%)      | 1(0%)  |
| Oct.2013 (3)   | 170(41%) | 2(0%)          | 0(0%)              | 0(0%)        | 236(57%)     | 0(0%)  | 1(0%)      | 2(0%)  |
| May.2015 (4)   | 192(42%) | 0(0%)          | 6(1%)              | 0(0%)        | 248(55%)     | 4(1%)  | 2(0%)      | 1(0%)  |
| Jan.2017 (5)   | 191(33%) | 1(0%)          | 9(2%)              | 1(0%)        | 359(62%)     | 3(1%)  | 9(2%)      | 9(2%)  |
| <b>Male</b>    |          |                |                    |              |              |        |            |        |
| Sep.2012 (2)   | 201(50%) | 6(1%)          | 5(1%)              | 0(0%)        | 176(44%)     | 5(1%)  | 1(0%)      | 7(2%)  |
| Oct.2013 (3)   | 311(49%) | 3(0%)          | 2(0%)              | 4(1%)        | 299(47%)     | 2(0%)  | 9(1%)      | 8(1%)  |
| May.2015 (4)   | 369(55%) | 0(0%)          | 4(1%)              | 5(1%)        | 268(40%)     | 5(1%)  | 12(2%)     | 8(1%)  |
| Jan.2017 (5)   | 340(45%) | 3(0%)          | 3(0%)              | 6(1%)        | 360(47%)     | 17(2%) | 19(3%)     | 10(1%) |

**Table 3S.** Proportion of Rakai Community Cohort Study (RCCS) fishing community study HIV-negative participants who ever initiated sex at each survey visit.

| <b>Visit</b> | <b>Female<br/>%(n/N)</b> | <b>Male<br/>%(n/N)</b> | <b>Female and Male<br/>%(n/N)*</b> |
|--------------|--------------------------|------------------------|------------------------------------|
| Jan.2012 (1) | 96.6(920/952)            | 95.8(1264/1320)        | 96.1(2184/2272)                    |
| Sep.2012 (2) | 96.0(955/995)            | 95.7(1349/1409)        | 95.8(2304/2404)                    |
| Oct.2013 (3) | 96.5(973/1008)           | 94.8(1324/1397)        | 95.5(2297/2405)                    |
| May.2015 (4) | 96.3(1125/1168)          | 95.4(1399/1467)        | 95.8(2524/2635)                    |
| Jan.2017 (5) | 95.4(1214/1273)          | 95.5(1648/1725)        | 95.5(2862/2998)                    |

\*p=0.28 test of trend

**Table 4S.** Proportion of Rakai Community Cohort Study (RCCS) fishing community study HIV-negative participants with multiple sex partnerships at each survey visit.

| <b>Visit</b> | <b>Female<br/>%(n/N)</b> | <b>Male<br/>%(n/N)</b> | <b>Female and Male<br/>%(n/N)*</b> |
|--------------|--------------------------|------------------------|------------------------------------|
| Jan.2012 (1) | 15.8(150/952)            | 55.2(728/1320)         | 38.6(878/2272)                     |
| Sep.2012 (2) | 15.8(157/995)            | 52.8(744/1409)         | 37.5(901/2404)                     |
| Oct.2013 (3) | 14.5(146/1008)           | 51.2(715/1397)         | 35.8(861/2405)                     |
| May.2015 (4) | 16.7(195/1168)           | 52.4(768/1466)         | 36.6(963/2634)**                   |
| Jan.2017 (5) | 17.5(223/1273)           | 57.5(992/1725)         | 40.5(1215/2998)                    |

\*p=0.21 test of trend; \*\*one participant missing information

**Table 5S.** Proportion of Rakai Community Cohort Study (RCCS) fishing community study HIV-negative participants with consistent condom use in non-marital sex relationships at each survey visit.

| <b>Visit</b> | <b>Female<br/>%(n/N)</b> | <b>Male<br/>%(n/N)</b> | <b>Female and Male<br/>%(n/N)*</b> |
|--------------|--------------------------|------------------------|------------------------------------|
| Jan.2012 (1) | 49.4(122/247)            | 37.3(218/585)          | 40.9(340/832)                      |
| Sep.2012 (2) | 46.4(122/263)            | 33.4(194/580)          | 37.5(316/843)                      |
| Oct.2013 (3) | 44.9(118/263)            | 36.5(210/575)          | 39.1(328/838)                      |
| May.2015 (4) | 44.4(131/295)            | 32.4(199/615)          | 36.3(330/910)                      |
| Jan.2017 (5) | 41.4(150/362)            | 31.3(237/758)          | 34.6(387/1120)                     |

\*p=0.0048 test of trend

**Table 6S.** Proportion of Rakai Community Cohort Study (RCCS) fishing community study participants who reported ever HIV tested.

| Visit        | Female<br>%(n/N) | Male<br>%(n/N)   | Female and Male<br>%(n/N)* |
|--------------|------------------|------------------|----------------------------|
| Jan.2012 (1) | 75.36(1401/1859) | 60.27(1212/2011) | 67.52(2613/3870)           |
| Sep.2012 (2) | 93.53(1720/1839) | 85.42(1816/2126) | 89.18(3536/3965)           |
| Oct.2013 (3) | 96.62(1800/1863) | 91.81(1894/2063) | 94.09(3694/3926)           |
| May.2015 (4) | 97.10(2008/2068) | 93.64(2016/2153) | 95.33(4024/4221)**         |
| Jan.2017 (5) | 97.92(2164/2210) | 93.43(2359/2525) | 95.53(4526/4738)           |

\*p<0.0001 test of trend; \*\*One participant missing HIV testing status

**Table 7S.** Proportion of Rakai Community Cohort Study (RCCS) fishing community study participants who self-reported ART use.

| Visit        | Female<br>%(n/N) | Male<br>%(n/N) | Female and Male<br>%(n/N)* |
|--------------|------------------|----------------|----------------------------|
| Jan.2012 (1) | 18.08(164/907)   | 13.02(90/691)  | 15.89(254/1598)            |
| Sep.2012 (2) | 30.69(259/844)   | 17.71(127/717) | 24.73(386/1561)            |
| Oct.2013 (3) | 48.71(417/856)   | 34.23(228/666) | 42.38(645/1522)            |
| May.2015 (4) | 72.00(648/900)   | 55.60(382/687) | 64.90(1030/1587)           |
| Jan.2017 (5) | 84.79(797/940)   | 77.88(623/800) | 81.61(1420/1740)           |

\*p<0.0001 test of trend

**Table 8S.** Proportion of Rakai Community Cohort Study (RCCS) fishing community study participants with viral suppression (VL<1000 copies/ml=Suppressed).

| Visit        | Female<br>%(n/N) | Male<br>%(n/N) | Female and Male<br>%(n/N)* |
|--------------|------------------|----------------|----------------------------|
| Jan.2012(1)  | 40.02(363/907)   | 26.56(183/689) | 34.21(546/1596)**          |
| May.2015 (4) | 76.20(686/899)   | 57.37(393/685) | 68.06(1078/1584)***        |
| Jan.2017 (5) | 84.63(793/937)   | 74.03(590/797) | 79.78(1383/1734)****       |

\*p<0.0001 test of trend; \*\* 2 viral load results missing; \*\*\* 3 viral load results missing; \*\*\*\* 4 viral load results missing

**Table 9S.** Proportion of Rakai Community Cohort Study (RCCS) fishing community study participants who self-reported male circumcision.

| Visit        | HIV-negative<br>%(n/N) | HIV-positive<br>%(n/N) | All Male<br>%(n/N)* |
|--------------|------------------------|------------------------|---------------------|
| Jan.2012 (1) | 39.77(525/1320)        | 25.04(173/691)         | 34.71(698/2011)     |
| Sep.2012 (2) | 47.20(665/1409)        | 30.40(218/717)         | 41.53(883/2126)     |
| Oct.2013 (3) | 58.05(811/1397)        | 39.64(264/666)         | 52.11(1075/2063)    |
| May.2015 (4) | 64.42(945/1467)        | 44.25(304/687)         | 57.99(1249/2154)    |
| Jan.2017 (5) | 70.78(1221/1725)       | 51.13(409/800)         | 64.55(1630/2525)    |

\*p<0.0001 test of trend

**Table 10S.** HIV incidence trends in Rakai Community Cohort Study (RCCS) fishing communities during scale-up of combination HIV interventions.

| <b>HIV incidence Cohort (N=3,222)</b>  |                           |                     |                                         |                    |                |                        |                |
|----------------------------------------|---------------------------|---------------------|-----------------------------------------|--------------------|----------------|------------------------|----------------|
| <i>Survey(s)</i>                       | <i>Incident HIV cases</i> | <i>person-years</i> | <i>HIV incidence per 100 py (95%CI)</i> | <i>IRR (95%CI)</i> | <i>p-value</i> | <i>adjIRR (95% CI)</i> | <i>p-value</i> |
| Sep.2012 (2)                           | 40                        | 1,165.5             | 3.43(2.45-4.67)                         | 1                  | -              | 1                      | -              |
| Oct.2013 (3)                           | 64                        | 2,108.1             | 3.04(2.34-3.88)                         | 0.88(0.60-1.31)    | 0.54           | 0.93(0.63-1.38)        | 0.72           |
| May.2015 (4)                           | 72                        | 2,799.8             | 2.57(2.01-3.24)                         | 0.75(0.51-1.10)    | 0.14           | 0.76(0.51-1.12)        | 0.16           |
| Jan.2017 (5)                           | 54                        | 3,403.7             | 1.59(1.19-2.07)                         | 0.46(0.31-0.69)    | 0.00021        | 0.52(0.34-0.79)        | 0.0021         |
| <b>Women (N=1,361)</b>                 |                           |                     |                                         |                    |                |                        |                |
| <i>Survey(s)</i>                       | <i>Incident HIV cases</i> | <i>person-years</i> | <i>HIV incidence per 100 py (95%CI)</i> | <i>IRR (95%CI)</i> | <i>p-value</i> | <i>adjIRR (95% CI)</i> | <i>p-value</i> |
| Sep.2012 (2)                           | 18                        | 495.9               | 3.63(2.15-5.74)                         | 1                  | -              | 1                      | -              |
| Oct.2013 (3)                           | 29                        | 870.7               | 3.33(2.23-4.78)                         | 0.92(0.51-1.65)    | 0.77           | 0.95(0.52-1.73)        | 0.87           |
| May.2015 (4)                           | 35                        | 1,147.6             | 3.05(2.12-4.24)                         | 0.84(0.48-1.48)    | 0.54           | 0.83(0.46-1.49)        | 0.53           |
| Jan.2017 (5)                           | 26                        | 1,401.2             | 1.86(1.21-2.72)                         | 0.51(0.28-0.93)    | 0.028          | 0.51(0.27-0.96)        | 0.038          |
| <b>Men (N=1861)</b>                    |                           |                     |                                         |                    |                |                        |                |
| <i>Survey(s)</i>                       | <i>Incident HIV cases</i> | <i>person-years</i> | <i>HIV incidence per 100 py (95%CI)</i> | <i>IRR (95%CI)</i> | <i>p-value</i> | <i>adjIRR (95% CI)</i> | <i>p-value</i> |
| Sep.2012 (2)                           | 22                        | 669.5               | 3.29(2.06-4.97)                         | 1                  | -              | 1                      | -              |
| Oct.2013 (3)                           | 35                        | 1,237.3             | 2.83(1.97-3.93)                         | 0.85(0.50-1.45)    | 0.55           | 0.91(0.53-1.55)        | 0.73           |
| May.2015 (4)                           | 37                        | 1,652.2             | 2.24(1.58-3.09)                         | 0.66(0.39-1.12)    | 0.13           | 0.71(0.42-1.20)        | 0.20           |
| Jan.2017 (5)                           | 28                        | 2,002.5             | 1.40(0.93-2.02)                         | 0.42(0.24-0.73)    | 0.0022         | 0.53(0.30-0.93)        | 0.027          |
| <b>Circumcised men only (N=1056)*</b>  |                           |                     |                                         |                    |                |                        |                |
| <i>Survey(s)</i>                       | <i>Incident HIV cases</i> | <i>person-years</i> | <i>HIV incidence per 100 py (95%CI)</i> | <i>IRR (95%CI)</i> | <i>p-value</i> | <i>adjIRR (95% CI)</i> | <i>p-value</i> |
| Sep.2012 (2)                           | 7                         | 336.9               | 2.08(0.84-4.28)                         | 1                  | -              | 1                      | -              |
| Oct.2013 (3)                           | 15                        | 767.3               | 1.95(1.09-3.22)                         | 0.95(0.39-2.31)    | 0.90           | 0.94(0.39-2.27)        | 0.89           |
| May.2015 (4)                           | 17                        | 1,075.6             | 1.58(0.92-2.53)                         | 0.75(0.31-1.81)    | 0.52           | 0.71(0.29-1.71)        | 0.44           |
| Jan.2017 (5)                           | 14                        | 1,455.5             | 0.96(0.53-1.61)                         | 0.47(0.19-1.15)    | 0.097          | 0.49(0.20-1.21)        | 0.12           |
| <b>Uncircumcised men only (N=805)*</b> |                           |                     |                                         |                    |                |                        |                |
| <i>Survey(s)</i>                       | <i>Incident HIV cases</i> | <i>person-years</i> | <i>HIV incidence per 100 py (95%CI)</i> | <i>IRR (95%CI)</i> | <i>p-value</i> | <i>adjIRR (95% CI)</i> | <i>p-value</i> |
| Sep.2012 (2)                           | 15                        | 332.6               | 4.51(2.52-7.44)                         | 1                  | -              | 1                      | -              |
| Oct.2013 (3)                           | 20                        | 470.0               | 4.25(2.60-6.57)                         | 0.91(0.47-1.78)    | 0.79           | 0.88(0.44-1.74)        | 0.71           |
| May.2015 (4)                           | 20                        | 576.6               | 3.47(2.12-5.36)                         | 0.73(0.37-1.42)    | 0.36           | 0.71(0.36-1.39)        | 0.31           |
| Jan.2017 (5)                           | 14                        | 547.0               | 2.56(1.40-4.29)                         | 0.53(0.26-1.11)    | 0.092          | 0.56(0.27-1.19)        | 0.13           |

CI=Confidence Interval; IRR=Incidence Rate Ratio; adjIRR=Adjusted Incidence Rate Ratio; \*Incidence rates include all males, while IRR and adjIRR exclude males aged 15-19 in whom zero HIV incidence cases were observed; Final adjusted model included age, sex, marital status, level of education, number of sexual partners in past year, sex with partners outside community, self-reported genital ulcer disease, and consistent condom use with non-marital partners.

**Table 11S.** HIV prevalence and associated factors among study participants in Rakai Community Cohort Study (RCCS) fishing communities.

| <i>Variable</i>                                                | <i>Prevalence(n/N)</i> | <i>PRR (95%CI)</i> | <i>p-value</i> | <i>adjPRR (95%CI)</i> | <i>p-value</i> |
|----------------------------------------------------------------|------------------------|--------------------|----------------|-----------------------|----------------|
| <i>Survey(s)</i>                                               |                        |                    |                |                       |                |
| Jan.2012 (1)                                                   | 41.3(1598/3870)        | 1                  | -              | 1                     | -              |
| Sep.2012 (2)                                                   | 39.4(1561/3965)        | 1.02(1.01-1.03)    | 0.0038         | 1.01(1.00-1.02)       | 0.16           |
| Oct.2013 (3)                                                   | 38.7(1521/3926)        | 1.07(1.05-1.09)    | <0.0001        | 1.03(1.01-1.05)       | <0.0001        |
| May.2015 (4)                                                   | 37.5(1585/4222)        | 1.12(1.09-1.14)    | <0.0001        | 1.05(1.03-1.07)       | <0.0001        |
| Jan.2017 (5)                                                   | 36.7(1740/4738)        | 1.15(1.13-1.18)    | <0.0001        | 1.05(1.03-1.08)       | <0.0001        |
| <b>Age (years)</b>                                             |                        |                    |                |                       |                |
| 15-19                                                          | 8.3(152/1836)          | 1                  | -              | 1                     | -              |
| 20-24                                                          | 25.4(936/3690)         | 1.61(1.47-1.76)    | <0.0001        | 1.48(1.36-1.61)       | <0.0001        |
| 25-29                                                          | 40.6(1901/4688)        | 2.10(1.92-2.31)    | <0.0001        | 1.82(1.66-2.00)       | <0.0001        |
| 30-34                                                          | 47.9(2052/4284)        | 2.37(2.16-2.60)    | <0.0001        | 1.98(1.81-2.18)       | <0.0001        |
| 35-39                                                          | 50.3(1620/3219)        | 2.53(2.30-2.78)    | <0.0001        | 2.06(1.87-2.27)       | <0.0001        |
| >39 years                                                      | 44.7(1343/3004)        | 2.64(2.40-2.91)    | <0.0001        | 2.10(1.91-2.32)       | <0.0001        |
| <b>Marital status</b>                                          |                        |                    |                |                       |                |
| Never married                                                  | 12.0(349/2898)         | 1                  | -              | 1                     | -              |
| Married                                                        | 39.8(5075/12760)       | 1.26(1.20-1.33)    | <0.0001        | 1.18(1.12-1.25)       | <0.0001        |
| Previously married                                             | 51.0(2582/5061)        | 1.31(1.24-1.38)    | <0.0001        | 1.23(1.17-1.30)       | <0.0001        |
| <b>Education</b>                                               |                        |                    |                |                       |                |
| None                                                           | 54.0(969/1795)         | 1                  | -              | 1                     | -              |
| Primary                                                        | 40.8(6136/15052)       | 0.74(0.69-0.80)    | <0.0001        | 0.81(0.75-0.87)       | <0.0001        |
| Secondary/Tertiary                                             | 23.2(900/3871)         | 0.40(0.36-0.44)    | <0.0001        | 0.47(0.42-0.52)       | <0.0001        |
| <b>Sex with partners outside of the community in last year</b> |                        |                    |                |                       |                |
| None                                                           | 40.5(5803/14342)       | 1                  | -              | 1                     | -              |
| One or more                                                    | 34.5(2203/6377)        | 0.98(0.96-0.99)    | 0.0096         | 0.97(0.95-0.99)       | 0.0016         |
| <b>Self-reported genital ulcer disease in the last year</b>    |                        |                    |                |                       |                |
| No                                                             | 35.7(6241/17492)       | 1                  | -              | 1                     | -              |
| Yes                                                            | 54.7(1765/3227)        | 1.01(0.99-1.03)    | 0.30           | 1.05(1.03-1.07)       | <0.0001        |
| <b>Number of sex partners in the last year</b>                 |                        |                    |                |                       |                |
| None                                                           | 25.9(449/1735)         | 1                  | -              | 1                     | -              |
| One                                                            | 39.6(4337/10946)       | 1.03(1.00-1.05)    | 0.033          | 1.04(1.01-1.07)       | 0.016          |
| Two                                                            | 39.8(1758/4415)        | 1.02(0.99-1.05)    | 0.18           | 1.05(1.01-1.09)       | 0.010          |
| Three or more                                                  | 40.3(1462/3623)        | 1.02(0.98-1.05)    | 0.30           | 1.05(1.01-1.09)       | 0.021          |
| <b>Condom use</b>                                              |                        |                    |                |                       |                |
| No sex partner/ uses with stable partners                      | 39.0(5232/13403)       | 1                  | -              | 1                     | -              |
| Non-stable partner, inconsistent use                           | 37.5(1702/4544)        | 1.00(0.98-1.03)    | 0.84           | 1.00(0.97-1.02)       | 0.84           |
| Non-stable partner, consistent use                             | 38.7(1073/2774)        | 1.00(0.98-1.02)    | 0.97           | 1.00(0.98-1.03)       | 0.95           |

PRR=prevalence rate ratio, adjPRR=adjusted prevalence rate ratio

**Table 12S.** HIV prevalence and associated factors among Females in Rakai Community Cohort Study (RCCS) fishing communities.

| <i>Variable</i>                                                | <i>Prevalence(n/N)</i> | <i>PRR (95%CI)</i> | <i>p-value</i> | <i>adjPRR (95%CI)</i> | <i>p-value</i> |
|----------------------------------------------------------------|------------------------|--------------------|----------------|-----------------------|----------------|
| <b>Survey(s)</b>                                               |                        |                    |                |                       |                |
| Jan.2012 (1)                                                   | 48.8(907/1859)         | 1                  | -              | 1                     | -              |
| Sep.2012 (2)                                                   | 45.9(844/1839)         | 1.02(1.00-1.04)    | 0.018          | 1.01(1.00-1.03)       | 0.076          |
| Oct.2013 (3)                                                   | 45.9(856/1864)         | 1.05(1.03-1.07)    | <0.0001        | 1.02(1.00-1.05)       | 0.036          |
| May.2015 (4)                                                   | 43.5(900/2068)         | 1.09(1.06-1.12)    | <0.0001        | 1.04(1.01-1.07)       | 0.0027         |
| Jan.2017 (5)                                                   | 42.5(940/2213)         | 1.12(1.09-1.15)    | <0.0001        | 1.04(1.01-1.08)       | 0.0053         |
| <b>Age (years)</b>                                             |                        |                    |                |                       |                |
| 15-19                                                          | 14.2(141/991)          | 1                  | -              | 1                     | -              |
| 20-24                                                          | 34.5(692/2004)         | 1.50(1.36-1.65)    | <0.0001        | 1.40(1.27-1.54)       | <0.0001        |
| 25-29                                                          | 49.0(1120/2287)        | 1.88(1.70-2.09)    | <0.0001        | 1.66(1.50-1.84)       | <0.0001        |
| 30-34                                                          | 54.4(1080/1985)        | 2.03(1.83-2.26)    | <0.0001        | 1.74(1.57-1.93)       | <0.0001        |
| 35-39                                                          | 60.3(857/1422)         | 2.17(1.95-2.41)    | <0.0001        | 1.81(1.63-2.01)       | <0.0001        |
| >39 years                                                      | 48.3(556/1152)         | 2.19(1.97-2.45)    | <0.0001        | 1.81(1.62-2.02)       | <0.0001        |
| <b>Marital status</b>                                          |                        |                    |                |                       |                |
| Never married                                                  | 18.0(151/840)          | 1                  | -              | 1                     | -              |
| Married                                                        | 43.6(2719/6232)        | 1.20(1.11-1.30)    | <0.0001        | 1.16(1.06-1.27)       | 0.0011         |
| Previously married                                             | 56.9(1576/2769)        | 1.25(1.15-1.36)    | <0.0001        | 1.17(1.07-1.27)       | 0.00058        |
| <b>Education</b>                                               |                        |                    |                |                       |                |
| None                                                           | 57.4(558/972)          | 1                  | -              | 1                     | -              |
| Primary                                                        | 47.9(3293/6877)        | 0.82(0.75-0.89)    | <0.0001        | 0.87(0.79-0.95)       | 0.0014         |
| Secondary/Tertiary                                             | 29.8(593/1991)         | 0.45(0.40-0.52)    | <0.0001        | 0.52(0.46-0.60)       | <0.0001        |
| <b>Sex with partners outside of the community in last year</b> |                        |                    |                |                       |                |
| None                                                           | 44.9(3600/8026)        | 1                  | -              | 1                     | -              |
| One or more                                                    | 46.6(845/1815)         | 0.97(0.95-1.00)    | 0.073          | 0.97(0.95-1.00)       | 0.064          |
| <b>Self-reported genital ulcer disease in the last year</b>    |                        |                    |                |                       |                |
| No                                                             | 42.3(3391/8023)        | 1                  | -              | 1                     | -              |
| Yes                                                            | 58.0(1054/1818)        | 1.01(0.98-1.03)    | 0.64           | 1.02(1.00-1.04)       | 0.028          |
| <b>Number of sex partners in the last year</b>                 |                        |                    |                |                       |                |
| None                                                           | 38.7(322/833)          | 1                  | -              | 1                     | -              |
| One                                                            | 43.4(3081/7095)        | 1.01(0.98-1.04)    | 0.50           | 1.00(0.97-1.03)       | 0.98           |
| Two                                                            | 52.0(724/1394)         | 0.99(0.95-1.04)    | 0.86           | 1.01(0.96-1.06)       | 0.75           |
| Three or more                                                  | 61.3(318/519)          | 1.02(0.95-1.10)    | 0.52           | 1.04(0.97-1.12)       | 0.27           |
| <b>Condom use</b>                                              |                        |                    |                |                       |                |
| No sex partner/ uses with stable partners                      | 43.0(2988/6953)        | 1                  | -              | 1                     | -              |
| Non-stable partner, inconsistent use                           | 51.7(844/1631)         | 1.03(1.00-1.07)    | 0.034          | 1.04(1.01-1.08)       | 0.021          |
| Non-stable partner, consistent use                             | 48.9(616/1259)         | 1.02(0.99-1.05)    | 0.099          | 1.04(1.00-1.07)       | 0.039          |

CI=Confidence Interval; PRR=Prevalence Rate Ratio, adjPRR=adjusted Prevalence Rate Ratio



**Table 13S.** HIV prevalence and associated factors among Males in Rakai Community Cohort Study (RCCS) fishing communities.

| <i>Variable</i>                                                | <i>Prevalence(n/N)</i> | <i>PRR (95%CI)</i> | <i>p-value</i> | <i>adjPRR (95%CI)</i> | <i>p-value</i> |
|----------------------------------------------------------------|------------------------|--------------------|----------------|-----------------------|----------------|
| <i>Survey(s)</i>                                               |                        |                    |                |                       |                |
| Jan.2012 (1)                                                   | 34.4(691/2011)         | 1                  | -              | 1                     | -              |
| Sep.2012 (2)                                                   | 33.7(717/2126)         | 1.03(1.00-1.05)    | 0.037          | 1.01(0.99-1.04)       | 0.32           |
| Oct.2013 (3)                                                   | 32.3(666/2063)         | 1.09(1.06-1.13)    | <0.0001        | 1.04(1.01-1.07)       | 0.0063         |
| May.2015 (4)                                                   | 31.9(687/2154)         | 1.16(1.11-1.20)    | <0.0001        | 1.06(1.03-1.10)       | 0.00075        |
| Jan.2017 (5)                                                   | 31.7(800/2525)         | 1.18(1.14-1.23)    | <0.0001        | 1.06(1.02-1.11)       | 0.0023         |
| <b>Age (years)</b>                                             |                        |                    |                |                       |                |
| 15-19                                                          | 1.3(11/845)            | 1                  | -              | 1                     | -              |
| 20-24                                                          | 14.5(244/1685)         | 2.49(2.04-3.04)    | <0.0001        | 2.43(1.97-3.00)       | <0.0001        |
| 25-29                                                          | 32.6(782/2402)         | 3.73(3.03-4.60)    | <0.0001        | 3.42(2.77-4.24)       | <0.0001        |
| 30-34                                                          | 42.3(973/2299)         | 4.56(3.70-5.62)    | <0.0001        | 4.05(3.28-5.00)       | <0.0001        |
| 35-39                                                          | 42.5(764/1797)         | 4.91(3.99-6.04)    | <0.0001        | 4.22(3.42-5.22)       | <0.0001        |
| >39 years                                                      | 42.5(787/1851)         | 5.39(4.38-6.64)    | <0.0001        | 4.49(3.63-5.56)       | <0.0001        |
| <b>Marital status</b>                                          |                        |                    |                |                       |                |
| Never married                                                  | 9.6(198/2058)          | 1                  | -              | 1                     | -              |
| Married                                                        | 36.1(2357/6528)        | 1.38(1.28-1.48)    | <0.0001        | 1.20(1.11-1.31)       | <0.0001        |
| Previously married                                             | 43.9(1006/2292)        | 1.41(1.31-1.52)    | <0.0001        | 1.26(1.17-1.36)       | <0.0001        |
| <b>Education</b>                                               |                        |                    |                |                       |                |
| None                                                           | 49.9(411/823)          | 1                  | -              | 1                     | -              |
| Primary                                                        | 34.8(2843/8175)        | 0.67(0.60-0.75)    | <0.0001        | 0.76(0.69-0.84)       | <0.0001        |
| Secondary/Tertiary                                             | 16.3(307/1880)         | 0.32(0.27-0.38)    | <0.0001        | 0.41(0.35-0.49)       | <0.0001        |
| <b>Circumcision status</b>                                     |                        |                    |                |                       |                |
| No                                                             | 41.0(2193/5344)        | 1                  | -              | 1                     | -              |
| Yes                                                            | 24.7(1368/5535)        | 0.64(0.59-0.69)    | <0.0001        | 0.67(0.62-0.73)       | <0.0001        |
| <b>Sex with partners outside of the community in last year</b> |                        |                    |                |                       |                |
| None                                                           | 34.9(2203/6314)        | 1                  | -              | 1                     | -              |
| One or more                                                    | 29.8(1358/4562)        | 0.98(0.95-1.01)    | 0.15           | 0.97(0.94-0.99)       | 0.012          |
| <b>Self-reported genital ulcer disease in the last year</b>    |                        |                    |                |                       |                |
| No                                                             | 30.1(2850/9469)        | 1                  | -              | 1                     | -              |
| Yes                                                            | 50.5(711/1409)         | 1.03(1.00-1.07)    | 0.079          | 1.09(1.05-1.12)       | <0.0001        |
| <b>Number of sex partners in the last year</b>                 |                        |                    |                |                       |                |
| None                                                           | 14.1(127/902)          | 1                  | -              | 1                     | -              |
| One                                                            | 32.6(1256/3851)        | 1.08(1.03-1.14)    | 0.0063         | 1.09(1.03-1.15)       | 0.0050         |
| Two                                                            | 34.2(1034/3021)        | 1.09(1.04-1.15)    | 0.0057         | 1.12(1.05-1.19)       | 0.0004         |
| Three or more                                                  | 36.8(1144/3104)        | 1.09(1.03-1.15)    | 0.0018         | 1.13(1.06-1.21)       | 0.00035        |
| <b>Condom use</b>                                              |                        |                    |                |                       |                |
| No sex partner/ uses with stable partners                      | 34.8(2246/6451)        | 1                  | -              | 1                     | -              |
| Non-stable partner, inconsistent use                           | 29.4(858/2913)         | 0.97(0.94-1.01)    | 0.15           | 0.96(0.92-1.00)       | 0.065          |
| Non-stable partner, consistent use                             | 30.2(457/1515)         | 0.97(0.94-1.01)    | 0.17           | 0.98(0.94-1.02)       | 0.28           |

CI=Confidence Interval; PRR=Prevalence Rate Ratio, adjPRR=adjusted Prevalence Rate Ratio

**Table 14S.** Factors associated with HIV incidence among Females in Rakai Community Cohort Study (RCCS) fishing communities.

| <i>Variable</i>                                                | <i>Incident cases</i> | <i>person-years</i> | <i>Incidence per 100 py (95%CI)</i> | <i>IRR (95%CI)</i> | <i>p-value</i> | <i>adjIRR (95%CI)</i> | <i>p-value</i> |
|----------------------------------------------------------------|-----------------------|---------------------|-------------------------------------|--------------------|----------------|-----------------------|----------------|
| <b>Survey(s)</b>                                               |                       |                     |                                     |                    |                |                       |                |
| Sep.2012 (2)                                                   | 18                    | 495.9               | 3.63(2.15-5.74)                     | 1                  | -              | 1                     | -              |
| Oct.2013 (3)                                                   | 29                    | 870.7               | 3.33(2.23-4.78)                     | 0.92(0.51-1.65)    | 0.77           | 0.95(0.52-1.73)       | 0.87           |
| May.2015 (4)                                                   | 35                    | 1,147.6             | 3.05(2.12-4.24)                     | 0.84(0.48-1.48)    | 0.54           | 0.83(0.46-1.49)       | 0.53           |
| Jan.2017 (5)                                                   | 26                    | 1,401.2             | 1.86(1.21-2.72)                     | 0.51(0.28-0.93)    | 0.028          | 0.51(0.27-0.96)       | 0.038          |
| <b>Age (years)</b>                                             |                       |                     |                                     |                    |                |                       |                |
| 15-19                                                          | 12                    | 305.1               | 3.93(2.03-6.87)                     | 1                  | -              | 1                     | -              |
| 20-24                                                          | 37                    | 840.4               | 4.40(3.10-6.07)                     | 1.12(0.58-2.14)    | 0.73           | 0.99(0.51-1.91)       | 0.96           |
| 25-29                                                          | 26                    | 925.5               | 2.81(1.84-4.12)                     | 0.72(0.36-1.42)    | 0.34           | 0.62(0.30-1.27)       | 0.19           |
| 30-34                                                          | 11                    | 758.6               | 1.45(0.72-2.59)                     | 0.37(0.16-0.84)    | 0.017          | 0.30(0.13-0.71)       | 0.0059         |
| 35-39                                                          | 14                    | 531.5               | 2.63(1.44-4.42)                     | 0.67(0.31-1.45)    | 0.31           | 0.56(0.26-1.22)       | 0.14           |
| >39 years                                                      | 8                     | 554.2               | 1.44(0.62-2.84)                     | 0.37(0.15-0.90)    | 0.028          | 0.36(0.14-0.94)       | 0.036          |
| <b>Marital status</b>                                          |                       |                     |                                     |                    |                |                       |                |
| Never married                                                  | 8                     | 319.2               | 2.51(1.08-4.94)                     | 1                  | -              | 1                     | -              |
| Married                                                        | 58                    | 2,697.9             | 2.15(1.63-2.78)                     | 0.86(0.41-1.80)    | 0.69           | 0.70(0.25-2.00)       | 0.51           |
| Previously married                                             | 42                    | 898.4               | 4.67(3.37-6.32)                     | 1.87(0.88-3.98)    | 0.11           | 1.85(0.81-4.19)       | 0.14           |
| <b>Education</b>                                               |                       |                     |                                     |                    |                |                       |                |
| None                                                           | 9                     | 315.5               | 2.85(1.30-5.42)                     | 1                  | -              | 1                     | -              |
| Primary                                                        | 84                    | 2,690.3             | 3.12(2.49-3.87)                     | 1.10(0.55-2.17)    | 0.79           | 0.85(0.44-1.67)       | 0.64           |
| Secondary/Tertiary                                             | 15                    | 909.6               | 1.65(0.92-2.72)                     | 0.58(0.25-1.32)    | 0.19           | 0.50(0.22-1.17)       | 0.11           |
| <b>Sex with partners outside of the community in last year</b> |                       |                     |                                     |                    |                |                       |                |
| None                                                           | 85                    | 3,393.7             | 2.51(2.00-3.10)                     | 1                  | -              | 1                     | -              |
| One or more                                                    | 23                    | 521.8               | 4.41(2.79-6.61)                     | 1.76(1.10-2.81)    | 0.018          | 1.00(0.60-1.68)       | 0.99           |
| <b>Self-reported genital ulcer disease in the last year</b>    |                       |                     |                                     |                    |                |                       |                |
| No                                                             | 83                    | 3,415.0             | 2.43(1.94-3.01)                     | 1                  | -              | 1                     | -              |
| Yes                                                            | 25                    | 500.4               | 5.00(3.23-7.38)                     | 2.05(1.31-3.22)    | 0.0017         | 1.58(0.99-2.51)       | 0.055          |
| <b># of sex partners in the last year</b>                      |                       |                     |                                     |                    |                |                       |                |
| None                                                           | 2                     | 305.0               | 0.66(0.08-2.37)                     | 1                  | -              | 1                     | -              |
| One                                                            | 68                    | 3,136.6             | 2.17(1.68-2.75)                     | 3.31(0.80-13.61)   | 0.098          | 4.73(0.96-23.30)      | 0.056          |
| Two                                                            | 26                    | 376.1               | 6.91(4.52-10.13)                    | 10.55(2.48-44.78)  | 0.0014         | 11.59(2.11-63.77)     | 0.0049         |
| Three or more                                                  | 12                    | 97.7                | 12.28(6.35-21.45)                   | 18.74(4.15-84.72)  | 0.00014        | 15.33(2.50-94.09)     | 0.0032         |
| <b>Non-marital relationships and consistent condom use</b>     |                       |                     |                                     |                    |                |                       |                |
| Stable partners only/no sex partners                           | 62                    | 2,970.6             | 2.09(1.60-2.68)                     | 1                  | -              | 1                     | -              |
| Non-stable partner, inconsistent use                           | 29                    | 502.5               | 5.77(3.87-8.29)                     | 2.79(1.77-4.32)    | <0.0001        | 0.87(0.39-1.96)       | 0.74           |
| Non-stable partner, consistent use                             | 17                    | 442.3               | 3.84(2.24-6.15)                     | 1.84(1.07-3.15)    | 0.026          | 0.79(0.33-1.90)       | 0.60           |

CI=Confidence Interval; IRR=Incidence Rate Ratio; adjIRR=Adjusted Incidence Rate Ratio

**Table 15S.** Factors associated with HIV incidence among Males in Rakai Community Cohort Study (RCCS) fishing communities.

| <i>Variable</i>                                                | <i>Incident cases</i> | <i>person-years</i> | <i>Incidence per 100 py (95%CI)</i> | <i>IRR (95%CI)</i> | <i>p-value</i> | <i>adjIRR (95%CI)</i> | <i>p-value</i> |
|----------------------------------------------------------------|-----------------------|---------------------|-------------------------------------|--------------------|----------------|-----------------------|----------------|
| <b>Survey(s)</b>                                               |                       |                     |                                     |                    |                |                       |                |
| Sep.2012 (2)                                                   | 22                    | 669.5               | 3.29(2.06-4.97)                     | 1                  | -              | 1                     | -              |
| Oct.2013 (3)                                                   | 35                    | 1,237.3             | 2.83(1.97-3.93)                     | 0.85(0.50-1.45)    | 0.55           | 0.91(0.53-1.55)       | 0.73           |
| May.2015 (4)                                                   | 37                    | 1,652.2             | 2.24(1.58-3.09)                     | 0.66(0.39-1.12)    | 0.13           | 0.71(0.42-1.20)       | 0.20           |
| Jan.2017 (5)                                                   | 28                    | 2,002.5             | 1.40(0.93-2.02)                     | 0.42(0.24-0.73)    | 0.0022         | 0.53(0.30-0.93)       | 0.027          |
| <b>Age (years)</b>                                             |                       |                     |                                     |                    |                |                       |                |
| 15-19                                                          | 0                     | 368.1               | -                                   | -                  | -              | -                     | -              |
| 20-24                                                          | 27                    | 990.8               | 2.73(1.80-3.96)                     | 1                  | -              | 1                     | -              |
| 25-29                                                          | 42                    | 1,252.7             | 3.35(2.42-4.53)                     | 1.23(0.76-2.00)    | 0.40           | 1.27(0.79-2.07)       | 0.33           |
| 30-34                                                          | 21                    | 1,083.8             | 1.94(1.20-2.96)                     | 0.71(0.40-1.26)    | 0.24           | 0.72(0.41-1.28)       | 0.26           |
| 35-39                                                          | 17                    | 871.9               | 1.95(1.14-3.12)                     | 0.72(0.39-1.32)    | 0.28           | 0.69(0.37-1.32)       | 0.26           |
| >39 years                                                      | 15                    | 994.2               | 1.51(0.84-2.49)                     | 0.55(0.29-1.04)    | 0.067          | 0.57(0.30-1.09)       | 0.090          |
| <b>Marital status</b>                                          |                       |                     |                                     |                    |                |                       |                |
| Never married                                                  | 16                    | 1,010.6             | 1.58(0.90-2.57)                     | 1                  | -              | 1                     | -              |
| Married                                                        | 68                    | 3,387.7             | 2.01(1.56-2.54)                     | 0.85(0.49-1.47)    | 0.56           | 1.06(0.48-2.32)       | 0.89           |
| Previously married                                             | 38                    | 1,163.2             | 3.27(2.31-4.48)                     | 1.39(0.77-2.51)    | 0.27           | 1.40(0.77-2.58)       | 0.27           |
| <b>Education</b>                                               |                       |                     |                                     |                    |                |                       |                |
| None                                                           | 10                    | 308.5               | 3.24(1.55-5.96)                     | 1                  | -              | 1                     | -              |
| Primary                                                        | 98                    | 4,152.1             | 2.36(1.92-2.88)                     | 0.75(0.38-1.45)    | 0.39           | 0.77(0.40-1.47)       | 0.43           |
| Secondary/Tertiary                                             | 14                    | 1,100.9             | 1.27(0.70-2.13)                     | 0.39(0.17-0.90)    | 0.027          | 0.48(0.21-1.07)       | 0.073          |
| <b>Circumcision status</b>                                     |                       |                     |                                     |                    |                |                       |                |
| No                                                             | 69                    | 1,926.2             | 3.58(2.79-4.53)                     | 1                  | -              | 1                     | -              |
| Yes                                                            | 53                    | 3,635.3             | 1.46(1.09-1.91)                     | 0.42(0.29-0.60)    | <0.0001        | 0.46(0.32-0.67)       | <0.0001        |
| <b>Sex with partners outside of the community in last year</b> |                       |                     |                                     |                    |                |                       |                |
| None                                                           | 77                    | 3,195.9             | 2.41(1.90-3.01)                     | 1                  | -              | 1                     | -              |
| One or more                                                    | 45                    | 2,365.7             | 1.90(1.39-2.55)                     | 0.75(0.52-1.09)    | 0.13           | 0.71(0.47-1.08)       | 0.11           |
| <b>Self-reported genital ulcer disease in the last year</b>    |                       |                     |                                     |                    |                |                       |                |
| No                                                             | 96                    | 5,116.8             | 1.88(1.52-2.29)                     | 1                  | -              | 1                     | -              |
| Yes                                                            | 26                    | 444.8               | 5.85(3.82-8.57)                     | 2.98(1.93-4.60)    | <0.0001        | 2.19(1.39-3.43)       | 0.00066        |
| <b># of sex partners in the last year</b>                      |                       |                     |                                     |                    |                |                       |                |
| None                                                           | 4                     | 379.9               | 1.05(0.29-2.70)                     | 1                  | -              | 1                     | -              |
| One                                                            | 35                    | 2,006.1             | 1.74(1.22-2.43)                     | 1.10(0.39-3.09)    | 0.86           | 1.21(0.37-3.93)       | 0.75           |
| Two                                                            | 36                    | 1,631.3             | 2.21(1.55-3.06)                     | 1.35(0.48-3.80)    | 0.57           | 1.62(0.48-5.43)       | 0.44           |
| Three or more                                                  | 47                    | 1,544.3             | 3.04(2.24-4.05)                     | 1.88(0.68-5.21)    | 0.23           | 2.09(0.59-7.37)       | 0.25           |
| <b>Non-marital relationships and consistent condom use</b>     |                       |                     |                                     |                    |                |                       |                |
| Stable partners only/no sex partners                           | 62                    | 3,307.0             | 1.87(1.44-2.40)                     | 1                  | -              | 1                     | -              |
| Non-stable partner, inconsistent use                           | 42                    | 1,525.6             | 2.75(1.98-3.72)                     | 1.53(1.03-2.26)    | 0.035          | 1.10(0.58-2.09)       | 0.77           |
| Non-stable partner, consistent use                             | 18                    | 728.9               | 2.47(1.46-3.90)                     | 1.43(0.85-2.42)    | 0.18           | 1.08(0.52-2.23)       | 0.84           |

CI=Confidence Interval; IRR=Incidence Rate Ratio; adjIRR=Adjusted Incidence Rate Ratio; Incidence rates include all males, while IRR and adjIRR exclude males aged 15-19 in whom zero HIV incidence cases were observed

**Table 16S.** Factors associated with HIV incidence among Circumcised Males in Rakai Community Cohort Study (RCCS) fishing communities.

| <i>Variable</i>                                                | <i>Incident cases</i> | <i>person-years</i> | <i>Incidence per 100 py (95%CI)</i> | <i>IRR (95%CI)</i> | <i>p-value</i> | <i>adjRR (95%CI)</i> | <i>p-value</i> |
|----------------------------------------------------------------|-----------------------|---------------------|-------------------------------------|--------------------|----------------|----------------------|----------------|
| <b>Survey(s)</b>                                               |                       |                     |                                     |                    |                |                      |                |
| Sep.2012 (2)                                                   | 7                     | 336.9               | 2.08(0.84-4.28)                     | 1                  | -              | 1                    | -              |
| Oct.2013 (3)                                                   | 15                    | 767.3               | 1.95(1.09-3.22)                     | 0.95(0.39-2.31)    | 0.90           | 0.94(0.39-2.27)      | 0.89           |
| May.2015 (4)                                                   | 17                    | 1,075.6             | 1.58(0.92-2.53)                     | 0.75(0.31-1.81)    | 0.52           | 0.71(0.29-1.71)      | 0.44           |
| Jan.2017 (5)                                                   | 14                    | 1,455.5             | 0.96(0.53-1.61)                     | 0.47(0.19-1.15)    | 0.097          | 0.49(0.20-1.21)      | 0.12           |
| <b>Age (years)</b>                                             |                       |                     |                                     |                    |                |                      |                |
| 15-19                                                          | 0                     | 268.6               | 0.00(0.00-1.37)                     | -                  | -              | -                    | -              |
| 20-24                                                          | 11                    | 684.5               | 1.61(0.80-2.88)                     | 1                  | -              | 1                    | -              |
| 25-29                                                          | 20                    | 857.2               | 2.33(1.43-3.60)                     | 1.45(0.69-3.04)    | 0.32           | 1.55(0.74-3.23)      | 0.24           |
| 30-34                                                          | 9                     | 729.2               | 1.23(0.56-2.34)                     | 0.77(0.32-1.86)    | 0.56           | 0.88(0.36-2.13)      | 0.78           |
| 35-39                                                          | 7                     | 511.4               | 1.37(0.55-2.82)                     | 0.85(0.33-2.21)    | 0.74           | 0.98(0.35-2.70)      | 0.97           |
| >39 years                                                      | 6                     | 584.4               | 1.03(0.38-2.23)                     | 0.64(0.24-1.74)    | 0.38           | 0.76(0.27-2.13)      | 0.60           |
| <b>Marital status</b>                                          |                       |                     |                                     |                    |                |                      |                |
| Never married                                                  | 8                     | 689.3               | 1.16(0.50-2.29)                     | 1                  | -              | 1                    | -              |
| Married                                                        | 29                    | 2,243.8             | 1.29(0.87-1.86)                     | 0.73(0.33-1.59)    | 0.43           | 0.68(0.21-2.27)      | 0.53           |
| Previously married                                             | 16                    | 702.2               | 2.28(1.30-3.70)                     | 1.29(0.55-3.03)    | 0.56           | 1.14(0.45-2.84)      | 0.78           |
| <b>Education</b>                                               |                       |                     |                                     |                    |                |                      |                |
| None                                                           | 2                     | 188.4               | 1.06(0.13-3.83)                     | 1                  | -              | 1                    | -              |
| Primary                                                        | 43                    | 2,647.3             | 1.62(1.18-2.19)                     | 1.57(0.37-6.61)    | 0.54           | 1.58(0.38-6.56)      | 0.53           |
| Secondary/Tertiary                                             | 8                     | 799.6               | 1.00(0.43-1.97)                     | 0.94(0.20-4.53)    | 0.94           | 0.97(0.21-4.60)      | 0.97           |
| <b>Sex with partners outside of the community in last year</b> |                       |                     |                                     |                    |                |                      |                |
| None                                                           | 33                    | 1,996.4             | 1.65(1.14-2.32)                     | 1                  | -              | 1                    | -              |
| One or more                                                    | 20                    | 1,638.9             | 1.22(0.75-1.88)                     | 0.70(0.40-1.22)    | 0.21           | 0.69(0.38-1.26)      | 0.23           |
| <b>Self-reported genital ulcer disease in the last year</b>    |                       |                     |                                     |                    |                |                      |                |
| No                                                             | 45                    | 3,393.8             | 1.33(0.97-1.77)                     | 1                  | -              | 1                    | -              |
| Yes                                                            | 8                     | 241.5               | 3.31(1.43-6.53)                     | 2.35(1.11-5.00)    | 0.026          | 1.86(0.84-4.10)      | 0.13           |
| <b>Number of sex partners in the last year</b>                 |                       |                     |                                     |                    |                |                      |                |
| None                                                           | 3                     | 256.8               | 1.17(0.24-3.41)                     | 1                  | -              | 1                    | -              |
| One                                                            | 17                    | 1,243.5             | 1.37(0.80-2.19)                     | 0.73(0.21-2.49)    | 0.61           | 1.05(0.27-4.16)      | 0.94           |
| Two                                                            | 13                    | 1,096.4             | 1.19(0.63-2.03)                     | 0.60(0.17-2.13)    | 0.43           | 0.92(0.21-4.09)      | 0.92           |
| Three or more                                                  | 20                    | 1,038.7             | 1.93(1.18-2.97)                     | 1.00(0.30-3.35)    | 1.0            | 1.46(0.31-6.94)      | 0.64           |
| <b>Non-marital relationships and consistent condom use</b>     |                       |                     |                                     |                    |                |                      |                |
| Stable partners only/no sex partners                           | 28                    | 2,165.2             | 1.29(0.86-1.87)                     | 1                  | -              | 1                    | -              |
| Non-stable partner, inconsistent use                           | 18                    | 1,005.8             | 1.79(1.06-2.83)                     | 1.43(0.79-2.57)    | 0.24           | 0.94(0.34-2.61)      | 0.91           |
| Non-stable partner, consistent use                             | 7                     | 464.2               | 1.51(0.61-3.11)                     | 1.30(0.57-2.97)    | 0.54           | 0.93(0.30-2.88)      | 0.90           |

CI=Confidence Interval; IRR=Incidence Rate Ratio; adjIRR=Adjusted Incidence Rate Ratio; Incidence rates include all males, while IRR and adjIRR exclude males aged 15-19 in whom zero HIV incidence cases were observed

**Table 17S.** Factors associated with HIV incidence among Uncircumcised Males in Rakai Community Cohort Study (RCCS) fishing communities.

| <i>Variable</i>                                                | <i>Incident cases</i> | <i>person-years</i> | <i>Incidence per 100 py (95%CI)</i> | <i>IRR (95%CI)</i> | <i>p-value</i> | <i>adjIRR (95%CI)</i> | <i>p-value</i> |
|----------------------------------------------------------------|-----------------------|---------------------|-------------------------------------|--------------------|----------------|-----------------------|----------------|
| <b>Survey(s)</b>                                               |                       |                     |                                     |                    |                |                       |                |
| Sep.2012 (2)                                                   | 15                    | 332.6               | 4.51(2.52-7.44)                     | 1                  | -              | 1                     | -              |
| Oct.2013 (3)                                                   | 20                    | 470.0               | 4.25(2.60-6.57)                     | 0.91(0.47-1.78)    | 0.79           | 0.88(0.44-1.74)       | 0.71           |
| May.2015 (4)                                                   | 20                    | 576.6               | 3.47(2.12-5.36)                     | 0.73(0.37-1.42)    | 0.36           | 0.71(0.36-1.39)       | 0.31           |
| Jan.2017 (5)                                                   | 14                    | 547.0               | 2.56(1.40-4.29)                     | 0.53(0.26-1.11)    | 0.092          | 0.56(0.27-1.19)       | 0.13           |
| <b>Age (years)</b>                                             |                       |                     |                                     |                    |                |                       |                |
| 15-19                                                          | 0                     | 99.5                | -                                   | -                  | -              | -                     | -              |
| 20-24                                                          | 16                    | 306.3               | 5.22(2.99-8.48)                     | 1                  | -              | 1                     | -              |
| 25-29                                                          | 22                    | 395.5               | 5.56(3.49-8.42)                     | 1.06(0.55-2.05)    | 0.85           | 1.12(0.58-2.14)       | 0.74           |
| 30-34                                                          | 12                    | 354.6               | 3.38(1.75-5.91)                     | 0.65(0.31-1.37)    | 0.26           | 0.65(0.31-1.38)       | 0.26           |
| 35-39                                                          | 10                    | 360.6               | 2.77(1.33-5.10)                     | 0.53(0.24-1.18)    | 0.12           | 0.57(0.25-1.30)       | 0.18           |
| >39 years                                                      | 9                     | 409.8               | 2.20(1.00-4.17)                     | 0.42(0.19-0.95)    | 0.038          | 0.47(0.20-1.10)       | 0.082          |
| <b>Marital status</b>                                          |                       |                     |                                     |                    |                |                       |                |
| Never married                                                  | 8                     | 321.3               | 2.49(1.07-4.91)                     | 1                  | -              | 1                     | -              |
| Married                                                        | 39                    | 1,143.9             | 3.41(2.42-4.66)                     | 0.98(0.45-2.12)    | 0.95           | 1.43(0.50-4.09)       | 0.51           |
| Previously married                                             | 22                    | 461.0               | 4.77(2.99-7.22)                     | 1.37(0.61-3.11)    | 0.45           | 1.67(0.73-3.79)       | 0.22           |
| <b>Education</b>                                               |                       |                     |                                     |                    |                |                       |                |
| None                                                           | 8                     | 120.1               | 6.66(2.87-13.12)                    | 1                  | -              | 1                     | -              |
| Primary                                                        | 55                    | 1,504.8             | 3.65(2.75-4.76)                     | 0.56(0.26-1.18)    | 0.13           | 0.58(0.26-1.28)       | 0.18           |
| Secondary/Tertiary                                             | 6                     | 301.3               | 1.99(0.73-4.33)                     | 0.30(0.10-0.88)    | 0.029          | 0.35(0.11-1.05)       | 0.061          |
| <b>Sex with partners outside of the community in last year</b> |                       |                     |                                     |                    |                |                       |                |
| None                                                           | 44                    | 1,199.5             | 3.67(2.67-4.92)                     | 1                  | -              | 1                     | -              |
| One or more                                                    | 25                    | 726.7               | 3.44(2.23-5.08)                     | 0.90(0.55-1.47)    | 0.66           | 0.74(0.42-1.32)       | 0.31           |
| <b>Self-reported genital ulcer disease in the last year</b>    |                       |                     |                                     |                    |                |                       |                |
| No                                                             | 51                    | 1,723.0             | 2.96(2.20-3.89)                     | 1                  | -              | 1                     | -              |
| Yes                                                            | 18                    | 203.2               | 8.86(5.25-14.00)                    | 2.93(1.72-5.01)    | <0.0001        | 2.32(1.30-4.12)       | 0.0042         |
| <b>Number of sex partners in the last year</b>                 |                       |                     |                                     |                    |                |                       |                |
| None                                                           | 1                     | 123.2               | 0.81(0.02-4.52)                     | 1                  | -              | 1                     | -              |
| One                                                            | 18                    | 762.5               | 2.36(1.40-3.73)                     | 2.17(0.29-16.18)   | 0.45           | 2.06(0.20-21.51)      | 0.55           |
| Two                                                            | 23                    | 534.9               | 4.30(2.73-6.45)                     | 3.94(0.53-29.11)   | 0.18           | 3.75(0.35-39.94)      | 0.27           |
| Three or more                                                  | 27                    | 505.6               | 5.34(3.52-7.77)                     | 4.87(0.66-35.71)   | 0.12           | 4.17(0.37-47.23)      | 0.25           |
| <b>Non-marital relationships and consistent condom use</b>     |                       |                     |                                     |                    |                |                       |                |
| Stable partners only/no sex partners                           | 34                    | 1,141.8             | 2.98(2.06-4.16)                     | 1                  | -              | 1                     | -              |
| Non-stable partner, inconsistent use                           | 24                    | 519.8               | 4.62(2.96-6.87)                     | 1.64(0.96-2.78)    | 0.068          | 1.20(0.52-2.76)       | 0.67           |
| Non-stable partner, consistent use                             | 11                    | 264.7               | 4.16(2.07-7.44)                     | 1.46(0.74-2.88)    | 0.28           | 1.16(0.44-3.06)       | 0.77           |

CI=Confidence Interval; IRR=Incidence Rate Ratio; adjIRR=Adjusted Incidence Rate Ratio; Incidence rates include all males, while IRR and adjIRR exclude males aged 15-19 in whom zero HIV incidence cases were observed

***Sensitivity analysis methods to evaluate effect of potential bias in survey participation and censoring to follow-up at subsequent surveys (Table 17S)***

We implemented inverse probability weighting for marginal structural models to estimate stabilized inverse probability weights to counter selective participation and censoring across surveys. We separately estimated the participation weight in a model including; age, sex, relationship to household head, and we estimated the censoring weight in a model including age, sex, relationship to household head, marital status, highest education level, number of sex partners, condom use practices with non-stable sex partners. The stabilized inverse probability weight was obtained as a ratio of the joint probability of the marginal distributions for participation and censoring, and the denominator as the joint probability for participation and contributing person time in the incidence cohort respectively. Weighted incidence rate ratios were estimated using Poisson regression assuming correlation within same participant observations and independence between participants.

**Table 18S.** Inverse probability weighted HIV incidence rate ratios in Rakai Community Cohort Study (RCCS) fishing communities.

| <i>Variable</i>                                                | <i>IRR (95%CI)</i> | <i>p-value</i> | <i>adjIRR (95%CI)</i> | <i>p-value</i> |
|----------------------------------------------------------------|--------------------|----------------|-----------------------|----------------|
| <i>Survey(s)</i>                                               |                    |                |                       |                |
| Sep.2012 (2)                                                   | 1                  | -              | 1                     | -              |
| Oct.2013 (3)                                                   | 0.89(0.60-1.32)    | 0.56           | 0.94(0.63-1.40)       | 0.77           |
| May.2015 (4)                                                   | 0.76(0.52-1.12)    | 0.17           | 0.78(0.53-1.15)       | 0.20           |
| Jan.2017 (5)                                                   | 0.47(0.31-0.71)    | 0.0028         | 0.53(0.35-0.81)       | 0.0030         |
| <b>Age (years)</b>                                             |                    |                |                       |                |
| 15-19                                                          | 1                  | -              | 1                     | -              |
| 20-24                                                          | 1.95(1.04-3.64)    | 0.036          | 1.34(0.69-2.59)       | 0.39           |
| 25-29                                                          | 1.86(1.00-3.47)    | 0.051          | 1.23(0.63-2.43)       | 0.55           |
| 30-34                                                          | 1.04(0.53-2.03)    | 0.92           | 0.65(0.32-1.34)       | 0.25           |
| 35-39                                                          | 1.29(0.66-2.54)    | 0.46           | 0.81(0.39-1.69)       | 0.57           |
| >39 years                                                      | 0.86(0.43-1.75)    | 0.68           | 0.60(0.28-1.27)       | 0.18           |
| <b>Sex</b>                                                     |                    |                |                       |                |
| Women                                                          | 1                  | -              | 1                     | -              |
| Uncircumcised men                                              | 1.30(0.96-1.77)    | 0.09           | 0.96(0.66-1.38)       | 0.81           |
| Circumcised men                                                | 0.52(0.37-0.72)    | 0.00011        | 0.42(0.28-0.63)       | <0.0001        |
| <b>Marital status</b>                                          |                    |                |                       |                |
| Never married                                                  | 1                  | -              | 1                     | -              |
| Married                                                        | 1.21(0.78-1.89)    | 0.39           | 1.16(0.59-2.28)       | 0.66           |
| Previously married                                             | 2.30(1.45-3.65)    | 0.00043        | 2.07(1.22-3.52)       | 0.0068         |
| <b>Education</b>                                               |                    |                |                       |                |
| None                                                           | 1                  | -              | 1                     | -              |
| Primary                                                        | 0.87(0.54-1.41)    | 0.57           | 0.83(0.52-1.31)       | 0.42           |
| Secondary/Tertiary                                             | 0.46(0.26-0.82)    | 0.009          | 0.49(0.28-0.88)       | 0.016          |
| <b>Sex with partners outside of the community in last year</b> |                    |                |                       |                |
| None                                                           | 1                  | -              | 1                     | -              |
| One or more                                                    | 0.95(0.71-1.26)    | 0.70           | 0.83(0.60-1.16)       | 0.28           |
| <b>Self-reported genital ulcer disease in the last year</b>    |                    |                |                       |                |
| No                                                             | 1                  | -              | 1                     | -              |
| Yes                                                            | 2.61(1.90-3.58)    | <0.0001        | 1.89(1.37-2.62)       | 0.0012         |
| <b>Number of sex partners in the last year</b>                 |                    |                |                       |                |
| None                                                           | 1                  | -              | 1                     | -              |
| One                                                            | 2.68(1.17-6.16)    | 0.020          | 2.38(0.90-6.27)       | 0.081          |
| Two                                                            | 4.19(1.79-9.79)    | 0.00093        | 4.56(1.60-12.98)      | 0.0045         |
| Three or more                                                  | 4.71(2.02-11.01)   | 0.00035        | 5.01(1.67-15.06)      | 0.0041         |
| <b>Non-marital relationships and consistent condom use</b>     |                    |                |                       |                |
| Stable partners only/no sex partners                           | 1                  | -              | 1                     | -              |
| Non-stable partner, inconsistent use                           | 1.83(1.36-2.46)    | <0.0001        | 1.13(0.66-1.95)       | 0.65           |
| Non-stable partner, consistent use                             | 1.53(1.05-2.23)    | 0.028          | 1.01(0.56-1.82)       | 0.98           |

CI=Confidence Interval; IRR=Incidence Rate Ratio; adjIRR=Adjusted Incidence Rate Ratio
